# Supplementary figures and images for: Anti-Inflammatory Activities of Euglena gracilis Extracts
Source: MDPI journal article supplement (doi:10.3390/microorganisms9102058), 2021-09-29

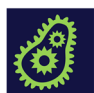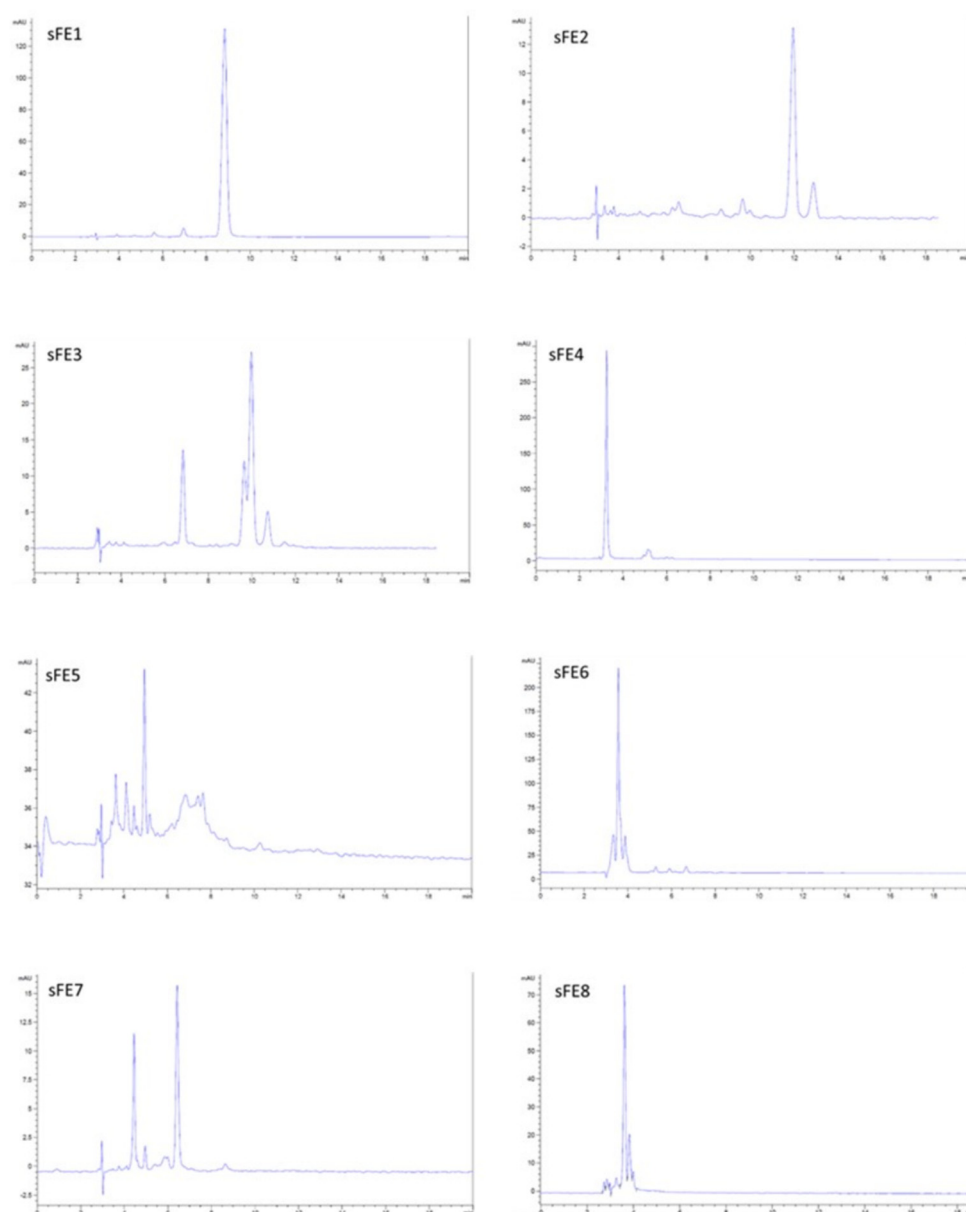

**Figure S1.** Chromatograms of subfractions sFE1 ÷ sFE8 acquired at 438 nm.

Supplement: s1 [file s1]
